# Supplementary material for: Synthesis, Characterization, and Sludge Dewaterability Evaluation of the Chitosan-Based Flocculant CCPAD
Source: MDPI journal article supplement (doi:10.3390/polym11010095), 2019-01-08
Supplement: s1 [file s1]

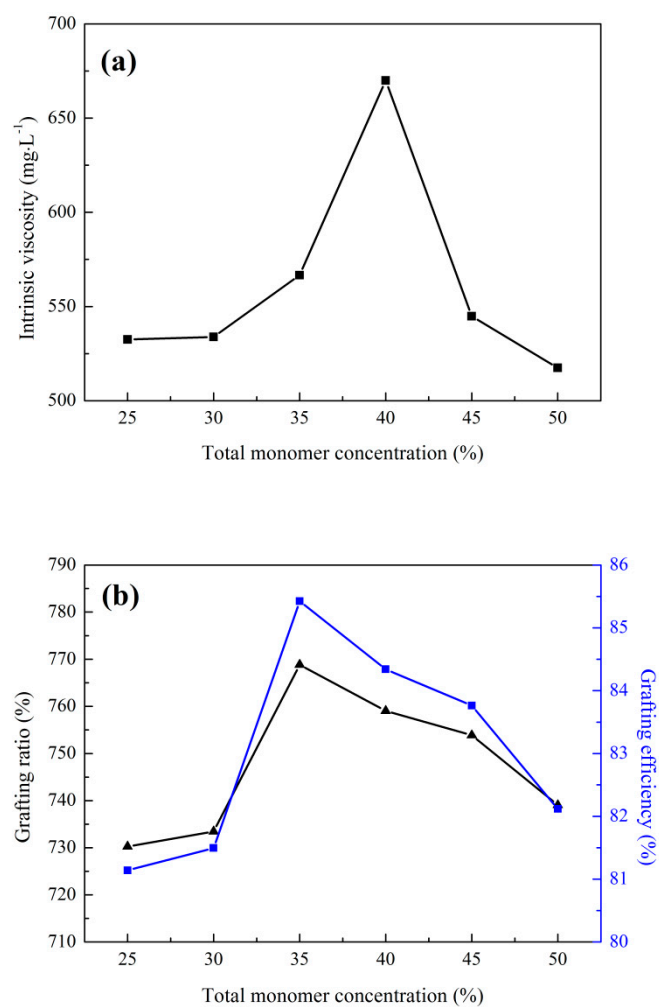

Figure S1. Effect of total monomer concentration on the synthesis of CCPAD: (a) intrinsic viscosity and (b) grafting ratio and grafting efficiency

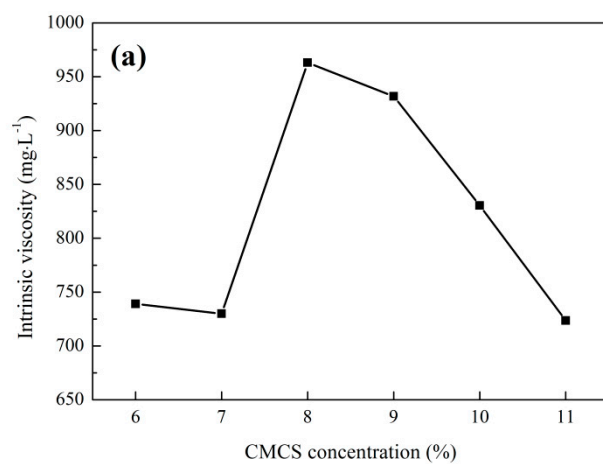

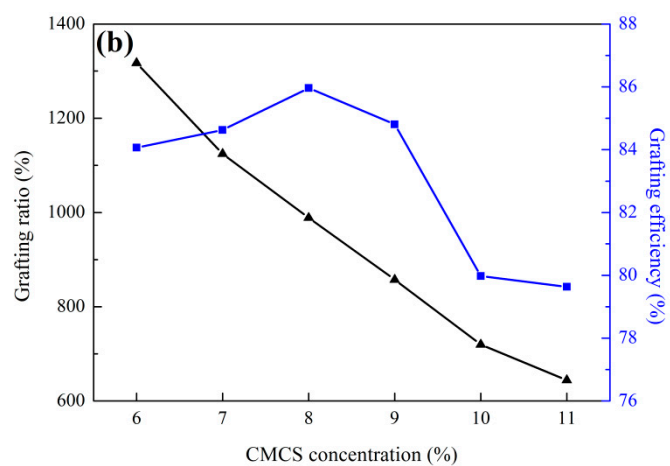

Figure S2. Effect of CMCS concentration on the synthesis of CCPAD: (a) intrinsic viscosity and  
(b) grafting ratio and grafting efficiency

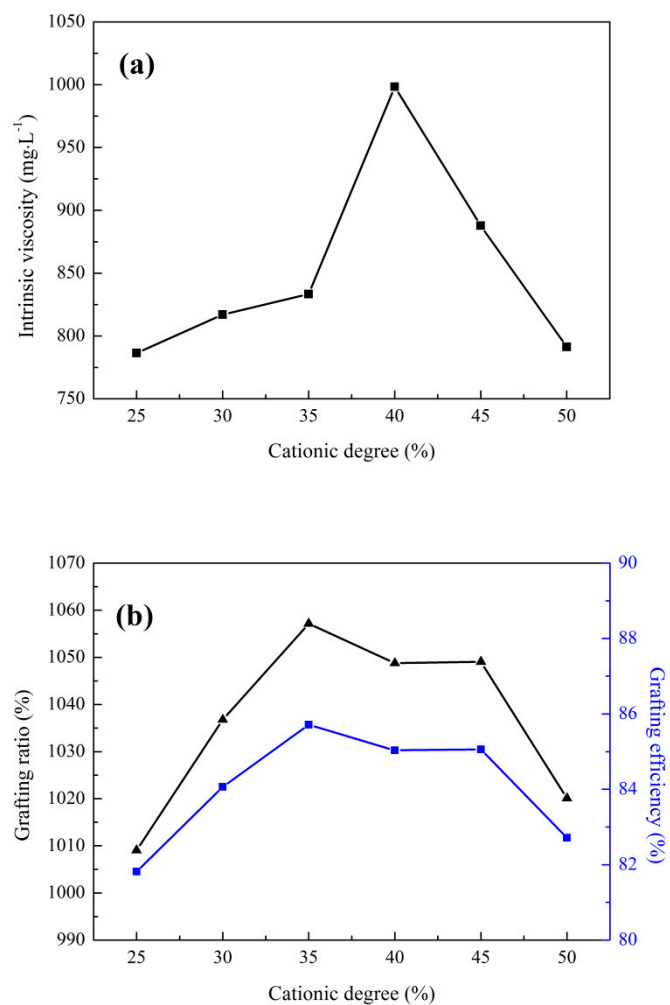

Figure S3. Effect of cationic degree on the synthesis of CCPAD: (a) intrinsic viscosity and (b)

### grafting ratio and grafting efficiency

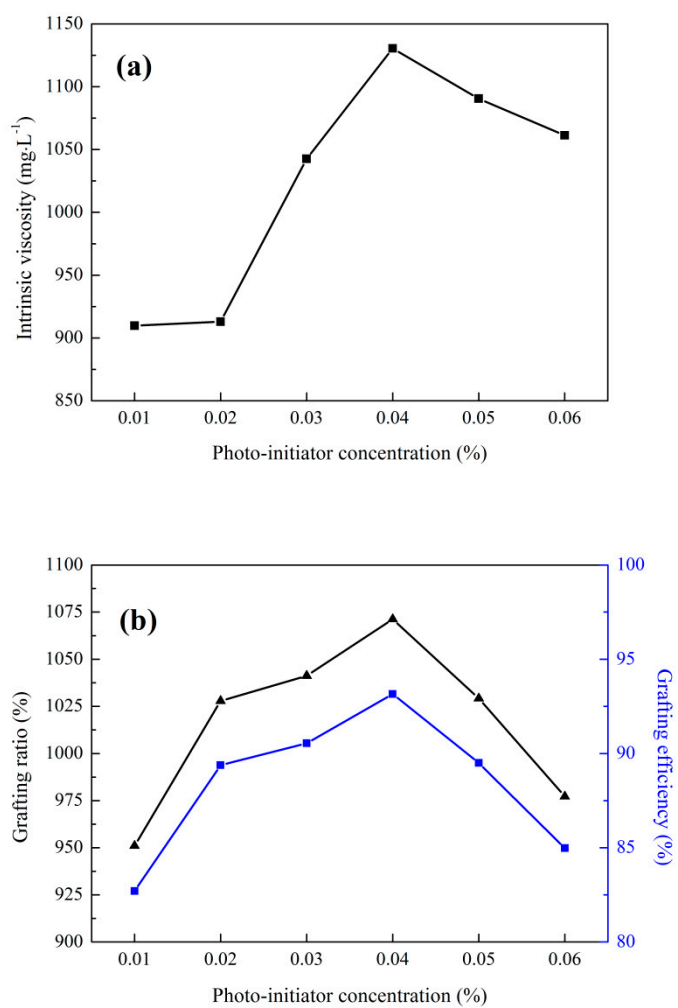

Figure S4. Effect of photo-initiator concentration on the synthesis of CCPAD: (a) intrinsic viscosity and (b) grafting ratio and grafting efficiency

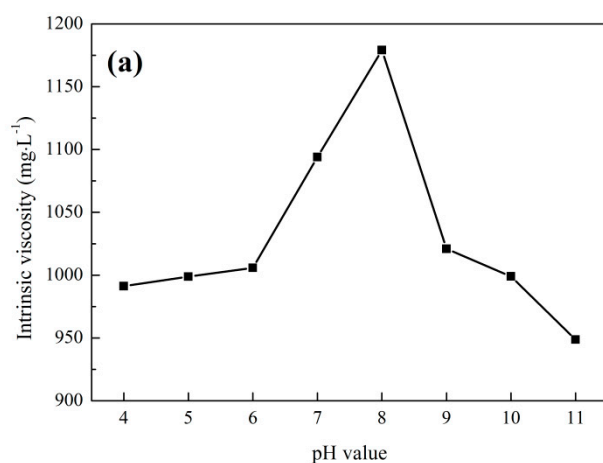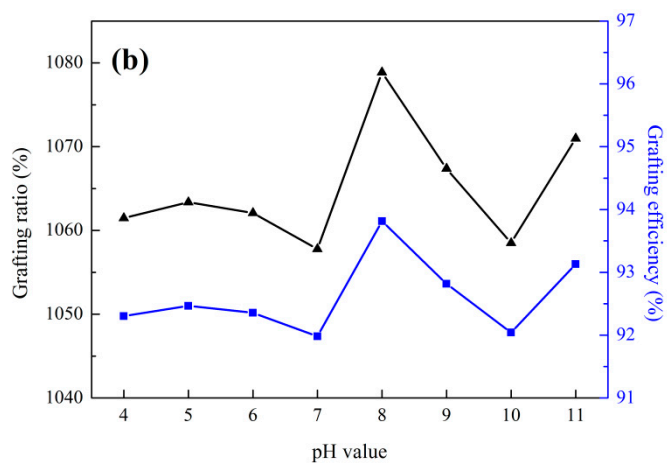

Figure S5. Effect of pH on the synthesis of CCPAD: (a) intrinsic viscosity and (b) grafting ratio and grafting efficiency

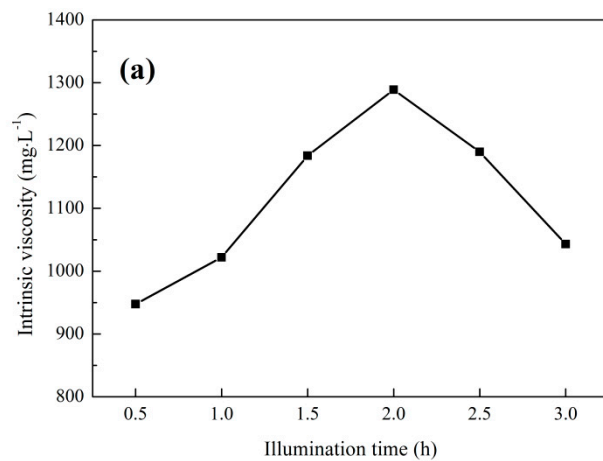

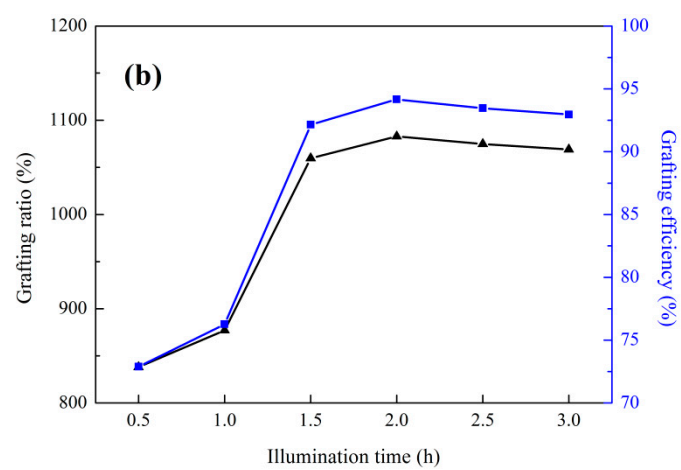

Figure S6. Effect of illumination time on the synthesis of CCPAD: (a) intrinsic viscosity and (b) grafting ratio and grafting efficiency
